# Supplementary material for: Patterns of whole-body muscle activations following vertical perturbations during standing and walking
Source: PubMed Central journal article supplement (PMC8101216; doi:10.1186/s12984-021-00836-0), 2021-05-06
Supplement: 12984_2021_836_MOESM3_ESM.pdf [file 12984_2021_836_MOESM3_ESM.pdf]

**Table 1:** Values of EMG parameters during standing conditions

|    |            | DC           | SC          | EC          | DC            | SC         | EC          | DC              | SC          | EC          |
|----|------------|--------------|-------------|-------------|---------------|------------|-------------|-----------------|-------------|-------------|
| DP | OL (s)     | 1.08±0.45    | 1.23±0.41   | 0.97±0.44   | 0.75±0.49     | 1.14±0.38  | 0.94±0.39   | 1.07±0.27       | 1.16±0.27   | 1.03±0.11   |
|    | DA (s)     | 0.69±0.41    | 0.53±0.29   | 0.74±0.41   | 0.91±0.51     | 0.57±0.29  | 0.69±0.22   | 0.68±0.26       | 0.65±0.28   | 0.76±0.22   |
|    | MAG (μV*s) | 5.70±4.29    | 4.14±3.63   | 7.75±5.26   | 6.15±3.81     | 4.13±3.37  | 8.77±7.67   | 6.37±4.76       | 5.41±4.37   | 9.71±6.78   |
| UP | OL (s)     | 0.84±0.35    | 1.09±0.34   | 0.95±0.40   | 0.78±0.34     | 1.10±0.42  | 0.83±0.41   | 0.68±0.27       | 0.81±0.51   | 0.72±0.37   |
|    | DA (s)     | 0.84±0.32    | 0.68±0.39   | 0.68±0.22   | 0.86±0.33     | 0.69±0.33  | 0.80±0.34   | 0.67±0.25       | 0.63±0.37   | 0.73±0.32   |
|    | MAG (μV*s) | 6.04±6.36    | 3.53±3.11   | 4.84±2.97   | 5.53±3.42     | 3.41±2.50  | 5.91±4.69   | 5.40±3.78       | 3.56±2.30   | 6.45±5.55   |
| FP | OL (s)     | 0.54±0.43    | 0.44±0.12   | 0.45±0.17   | 0.49±0.20     | 0.51±0.16  | 0.50±0.14   | 0.63±0.34       | 0.62±0.19   | 0.57±0.19   |
|    | DA (s)     | 0.86±0.40    | 1.09±0.27   | 1.06±0.24   | 0.81±0.29     | 0.99±0.28  | 1.04±0.27   | 0.76±0.29       | 0.92±0.22   | 0.93±0.19   |
|    | MAG (μV*s) | 17.49±12.77  | 29.30±15.98 | 32.73±17.11 | 15.46±10.74   | 26.2±14.78 | 30.79±19.99 | 16.81±9.75      | 27.93±16.79 | 30.82±16.60 |
| BP | OL (s)     | 0.54±0.26    | 0.61±0.33   | 0.56±0.31   | 0.60±0.30     | 0.68±0.24  | 0.66±0.19   | 0.37±0.09       | 0.37±0.13   | 0.36±0.11   |
|    | DA (s)     | 0.83±0.21    | 1.00±0.32   | 1.09±0.37   | 1.09±0.31     | 1.02±0.19  | 0.98±0.26   | 0.99±0.30       | 0.99±0.328  | 1.06±0.25   |
|    | MAG (μV*s) | 13.81±7.39   | 15.46±8.61  | 19.89±11.88 | 15.24±7.26    | 13.86±5.15 | 16.53±8.25  | 16.66±7.33      | 17.07±6.73  | 21.66±10.97 |
|    |            | Deltoid left |             |             | Deltoid right |            |             | Paraspinal left |             |             |

**Legend.** DP, UP, FP and BP represent, respectively, downward, upward, forward and backward perturbations. OL: onset latency; DA: duration of activation; MAG: activation magnitude; DC: dynamic camera; SC: static camera; EC: eyes closed. Color codes: blue represent shoulder abductors, orange posterior muscles and green anterior muscles.

**Table 1:** Values of EMG parameters during standing conditions

|    |            | DC               | SC          | EC          | DC                  | SC          | EC          | DC                   | SC          | EC          |
|----|------------|------------------|-------------|-------------|---------------------|-------------|-------------|----------------------|-------------|-------------|
| DP | OL (s)     | 1.20±0.30        | 1.20±0.26   | 1.03±0.22   | 1.07±0.24           | 1.06±0.29   | 1.05±0.18   | 0.96±0.24            | 1.08±0.39   | 0.88±0.25   |
|    | DA (s)     | 0.54±0.29        | 0.47±0.25   | 0.76±0.18   | 0.70±0.22           | 0.71±0.25   | 0.81±0.20   | 0.88±0.21            | 0.67±0.29   | 0.95±0.28   |
|    | MAG (µV*s) | 5.44±4.75        | 4.38±3.88   | 9.57±6.72   | 6.24±3.40           | 5.97±4.46   | 10.49±7.04  | 8.19±4.44            | 5.90±3.47   | 11.49±7.71  |
| UP | OL (s)     | 0.68±0.49        | 0.86±0.55   | 1.02±0.53   | 0.68±0.41           | 0.50±0.39   | 0.74±0.50   | 0.53±0.26            | 0.78±0.45   | 0.69±0.45   |
|    | DA (s)     | 0.90±0.43        | 0.66±0.40   | 0.67±0.46   | 0.77±0.31           | 1.05±0.41   | 0.83±0.37   | 1.01±0.37            | 0.85±0.38   | 0.93±0.39   |
|    | MAG (µV*s) | 6.89±4.24        | 3.99±3.33   | 5.61±5.22   | 5.41±3.64           | 5.42±3.01   | 7.53±4.05   | 7.42±5.37            | 4.14±2.35   | 8.46±8.00   |
| FP | OL (s)     | 0.54±0.32        | 0.58±0.25   | 0.56±0.24   | 0.39±0.11           | 0.40±0.09   | 0.51±0.19   | 0.39±0.09            | 0.52±0.23   | 0.54±0.29   |
|    | DA (s)     | 0.81±0.26        | 0.94±0.34   | 0.96±0.16   | 0.84±0.20           | 1.01±0.29   | 0.97±0.26   | 0.96±0.33            | 0.99±0.27   | 1.09±0.24   |
|    | MAG (µV*s) | 17.32±9.77       | 28.59±18.22 | 31.77±15.76 | 15.77±9.21          | 28.43±17.73 | 29.89±16.18 | 18.68±11.20          | 28.22±17.97 | 33.44±18.12 |
| BP | OL (s)     | 0.32±0.09        | 0.36±0.14   | 0.46±0.25   | 0.45±0.20           | 0.47±0.24   | 0.44±0.18   | 0.44±0.19            | 0.39±0.18   | 0.39±0.12   |
|    | DA (s)     | 0.98±0.26        | 0.94±0.24   | 0.90±0.33   | 0.98±0.25           | 1.07±0.28   | 1.21±0.26   | 1.16±0.33            | 1.13±0.38   | 1.18±0.25   |
|    | MAG (µV*s) | 17.02±7.12       | 15.68±5.77  | 18.31±9.96  | 16.27±7.24          | 17.42±6.17  | 21.86±7.43  | 17.61±7.14           | 18.46±7.96  | 22.00±9.49  |
|    |            | Paraspinal right |             |             | Biceps femoris left |             |             | Biceps femoris right |             |             |

**Legend.** DP, UP, FP and BP represent, respectively, downward, upward, forward and backward perturbations. OL: onset latency; DA: duration of activation; MAG: activation magnitude; DC: dynamic camera; SC: static camera; EC: eyes closed. Color codes: blue represent shoulder abductors, orange posterior muscles and green anterior muscles.

**Table 1:** Values of EMG parameters during standing conditions

|    |            | DC                 | SC          | EC          | DC                  | SC          | EC          | DC                    | SC          | EC          |
|----|------------|--------------------|-------------|-------------|---------------------|-------------|-------------|-----------------------|-------------|-------------|
| DP | OL (s)     | 0.97±0.19          | 0.96±0.32   | 0.96±0.24   | 0.93±0.14           | 1.00±0.14   | 0.98±0.09   | 0.97±0.46             | 0.90±0.53   | 0.85±0.41   |
|    | DA (s)     | 0.88±0.26          | 0.89±0.32   | 0.89±0.21   | 0.99±0.14           | 0.98±0.12   | 0.97±0.07   | 0.80±0.38             | 0.84±0.47   | 0.95±0.35   |
|    | MAG (μV*s) | 7.99±3.79          | 6.82±4.05   | 10.53±4.92  | 9.03±4.29           | 8.68±5.77   | 12.76±7.01  | 6.37±4.41             | 6.84±5.86   | 9.84±7.54   |
| UP | OL (s)     | 0.72±0.57          | 0.84±0.66   | 0.65±0.45   | 0.67±0.54           | 0.90±0.62   | 0.62±0.40   | 0.99±0.39             | 0.80±0.43   | 0.97±0.48   |
|    | DA (s)     | 0.80±0.37          | 0.69±0.48   | 1.03±0.43   | 0.63±0.31           | 0.59±0.43   | 0.68±0.25   | 0.75±0.39             | 0.95±0.46   | 0.73±0.39   |
|    | MAG (μV*s) | 6.76±6.12          | 4.68±4.64   | 8.75±5.52   | 7.50±6.06           | 5.82±7.98   | 7.57±2.94   | 5.93±5.58             | 4.79±2.71   | 5.90±5.59   |
| FP | OL (s)     | 0.57±0.26          | 0.64±0.21   | 0.63±0.21   | 0.57±0.24           | 0.63±0.22   | 0.63±0.20   | 0.33±0.07             | 0.35±0.09   | 0.41±0.18   |
|    | DA (s)     | 1.05±0.22          | 1.07±0.21   | 1.03±0.23   | 1.05±0.15           | 1.06±0.16   | 1.09±0.17   | 0.93±0.24             | 0.90±0.20   | 0.96±0.28   |
|    | MAG (μV*s) | 22.72±11.33        | 32.05±16.07 | 33.81±16.57 | 23.72±11.41         | 32.86±14.93 | 36.27±16.84 | 15.57±6.63            | 22.61±14.34 | 27.76±16.85 |
| BP | OL (s)     | 0.39±0.23          | 0.30±0.04   | 0.31±0.14   | 0.32±0.11           | 0.34±0.10   | 0.37±0.13   | 0.80±0.38             | 0.77±0.29   | 0.84±0.30   |
|    | DA (s)     | 0.87±0.30          | 0.95±0.32   | 1.01±0.31   | 1.01±0.30           | 0.95±0.33   | 1.11±0.34   | 0.92±0.32             | 0.91±0.21   | 0.89±0.28   |
|    | MAG (μV*s) | 15.73±7.26         | 18.50±7.59  | 21.99±10.31 | 18.79±7.90          | 18.93±8.14  | 23.61±10.37 | 12.28±6.72            | 13.41±7.00  | 14.34±10.19 |
|    |            | Gastrocnemius left |             |             | Gastrocnemius right |             |             | External oblique left |             |             |

**Legend.** DP, UP, FP and BP represent, respectively, downward, upward, forward and backward perturbations. OL: onset latency; DA: duration of activation; MAG: activation magnitude; DC: dynamic camera; SC: static camera; EC: eyes closed. Color codes: blue represent shoulder abductors, orange posterior muscles and green anterior muscles.

**Table 1:** Values of EMG parameters during standing conditions

|    |            | DC                     | SC          | EC          | DC                    | SC          | EC          | DC                     | SC          | EC         |
|----|------------|------------------------|-------------|-------------|-----------------------|-------------|-------------|------------------------|-------------|------------|
| DP | OL (s)     | 0.88±0.34              | 0.99±0.57   | 0.82±0.40   | 1.02±0.39             | 0.92±0.51   | 0.91±0.36   | 0.92±0.43              | 0.74±0.39   | 0.94±0.39  |
|    | DA (s)     | 0.79±0.26              | 0.72±0.45   | 0.86±0.43   | 0.66±0.30             | 0.73±0.39   | 0.64±0.32   | 0.64±0.30              | 0.74±0.30   | 0.62±0.37  |
|    | MAG (μV*s) | 5.44±2.72              | 4.55±4.09   | 8.49±6.36   | 4.92±3.22             | 5.19±5.21   | 6.16±2.12   | 4.10±2.09              | 4.47±2.89   | 6.42±6.47  |
| UP | OL (s)     | 0.96±0.37              | 0.76±0.38   | 1.05±0.31   | 0.97±0.46             | 0.97±0.51   | 1.04±0.52   | 0.96±0.40              | 1.08±0.49   | 1.12±0.31  |
|    | DA (s)     | 0.76±0.36              | 0.93±0.26   | 0.82±0.35   | 0.64±0.32             | 0.72±0.34   | 0.56±0.37   | 0.65±0.31              | 0.58±0.31   | 0.64±0.18  |
|    | MAG (μV*s) | 5.54±5.89              | 4.77±2.92   | 5.05±3.47   | 4.55±3.87             | 3.48±2.60   | 3.91±3.54   | 4.75±5.60              | 2.36±1.87   | 4.21±3.01  |
| FP | OL (s)     | 0.35±0.08              | 0.37±0.08   | 0.45±0.18   | 0.36±0.09             | 0.44±0.08   | 0.45±0.21   | 0.35±0.12              | 0.38±0.10   | 0.41±0.17  |
|    | DA (s)     | 0.83±0.26              | 0.81±0.22   | 0.79±0.19   | 0.65±0.24             | 0.66±0.19   | 0.69±0.27   | 0.68±0.25              | 0.69±0.23   | 0.66±0.21  |
|    | MAG (μV*s) | 13.21±6.94             | 18.84±11.69 | 22.30±13.37 | 10.55±6.77            | 16.01±13.64 | 17.42±12.89 | 10.33±6.85             | 15.85±12.08 | 16.69±9.39 |
| BP | OL (s)     | 0.92±0.42              | 0.95±0.29   | 0.98±0.38   | 0.91±0.34             | 1.00±0.32   | 0.84±0.23   | 0.95±0.54              | 0.97±0.39   | 0.88±0.18  |
|    | DA (s)     | 0.83±0.30              | 0.74±0.29   | 0.79±0.38   | 0.78±0.31             | 0.59±0.25   | 0.84±0.24   | 0.66±0.40              | 0.66±0.32   | 0.73±0.25  |
|    | MAG (μV*s) | 11.73±9.29             | 9.89±6.75   | 12.90±10.18 | 10.18±5.72            | 8.25±5.45   | 14.62±9.25  | 9.91±8.94              | 8.85±5.60   | 12.68±9.62 |
|    |            | External oblique right |             |             | Rectus abdominis left |             |             | Rectus abdominis right |             |            |

**Legend.** DP, UP, FP and BP represent, respectively, downward, upward, forward and backward perturbations. OL: onset latency; DA: duration of activation; MAG: activation magnitude; DC: dynamic camera; SC: static camera; EC: eyes closed. Color codes: blue represent shoulder abductors, orange posterior muscles and green anterior muscles.

**Table 1:** Values of EMG parameters during standing conditions

|    |            | DC                  | SC          | EC          | DC                   | SC          | EC          | DC                     | SC          | EC          |
|----|------------|---------------------|-------------|-------------|----------------------|-------------|-------------|------------------------|-------------|-------------|
| DP | OL (s)     | 0.81±0.46           | 1.06±0.37   | 0.66±0.35   | 0.77±0.33            | 0.85±0.57   | 0.66±0.32   | 0.89±0.19              | 0.92±0.19   | 0.86±0.21   |
|    | DA (s)     | 0.79±0.39           | 0.67±0.36   | 0.85±0.27   | 0.70±0.35            | 0.74±0.44   | 0.89±0.18   | 0.87±0.22              | 0.93±0.25   | 0.95±0.15   |
|    | MAG (μV*s) | 6.16±4.44           | 4.34±2.69   | 8.62±6.53   | 4.81±3.39            | 5.88±7.10   | 7.95±3.59   | 7.37±4.08              | 7.55±4.56   | 10.93±6.20  |
| UP | OL (s)     | 0.74±0.38           | 1.07±0.38   | 0.84±0.36   | 0.93±0.43            | 0.98±0.33   | 0.93±0.35   | 0.81±0.46              | 1.10±0.45   | 0.90±0.35   |
|    | DA (s)     | 0.85±0.33           | 0.64±0.32   | 0.79±0.30   | 0.78±0.34            | 0.75±0.27   | 0.72±0.32   | 0.81±0.32              | 0.65±0.21   | 0.73±0.25   |
|    | MAG (μV*s) | 6.43±4.94           | 3.08±2.13   | 5.21±2.74   | 5.23±3.58            | 3.62±2.25   | 4.03±1.71   | 6.07±3.75              | 3.57±2.34   | 5.59±2.33   |
| FP | OL (s)     | 0.36±0.03           | 0.37±0.06   | 0.39±0.11   | 0.34±0.03            | 0.35±0.05   | 0.37±0.12   | 0.35±0.07              | 0.39±0.15   | 0.35±0.08   |
|    | DA (s)     | 0.76±0.14           | 0.93±0.24   | 1.03±0.32   | 0.88±0.30            | 0.90±0.21   | 0.94±0.38   | 0.84±0.31              | 0.93±0.32   | 1.02±0.33   |
|    | MAG (μV*s) | 11.96±6.65          | 23.95±18.52 | 27.62±17.66 | 14.01±7.85           | 22.76±14.79 | 25.90±18.81 | 15.17±10.58            | 25.45±18.82 | 28.61±18.63 |
| BP | OL (s)     | 0.64±0.25           | 0.82±0.17   | 0.79±0.19   | 0.73±0.26            | 0.84±0.18   | 0.82±0.18   | 0.45±0.22              | 0.54±0.27   | 0.49±0.23   |
|    | DA (s)     | 1.01±0.28           | 0.92±0.21   | 0.98±0.23   | 0.95±0.17            | 0.90±0.22   | 0.92±0.15   | 0.95±0.39              | 0.90±0.35   | 1.10±0.25   |
|    | MAG (μV*s) | 14.42±6.84          | 11.24±4.64  | 14.62±7.67  | 12.69±6.62           | 10.36±5.68  | 13.85±7.28  | 15.74±9.18             | 14.08±5.91  | 19.25±9.44  |
|    |            | Rectus femoris left |             |             | Rectus femoris right |             |             | Tibialis anterior left |             |             |

**Legend.** DP, UP, FP and BP represent, respectively, downward, upward, forward and backward perturbations. OL: onset latency; DA: duration of activation; MAG: activation magnitude; DC: dynamic camera; SC: static camera; EC: eyes closed. Color codes: blue represent shoulder abductors, orange posterior muscles and green anterior muscles.

**Table 1:** Values of EMG parameters during standing conditions

|    |            | DC                             | SC          | EC          |
|----|------------|--------------------------------|-------------|-------------|
| DP | OL (s)     | 0.83±0.21                      | 1.03±0.22   | 0.92±0.16   |
|    | DA (s)     | 0.98±0.20                      | 0.81±0.22   | 0.94±0.20   |
|    | MAG (μV*s) | 8.49±4.24                      | 7.00±3.98   | 11.55±6.71  |
| UP | OL (s)     | 0.83±0.61                      | 0.93±0.65   | 0.79±0.38   |
|    | DA (s)     | 0.73±0.47                      | 0.60±0.41   | 0.65±0.22   |
|    | MAG (μV*s) | 6.74±5.98                      | 4.02±3.74   | 6.55±4.95   |
| FP | OL (s)     | 0.33±0.03                      | 0.38±0.17   | 0.34±0.07   |
|    | DA (s)     | 0.74±0.22                      | 0.92±0.31   | 0.99±0.31   |
|    | MAG (μV*s) | 14.64±10.72                    | 24.66±18.00 | 27.52±17.75 |
| BP | OL (s)     | 0.49±0.25                      | 0.62±0.24   | 0.60±0.27   |
|    | DA (s)     | 0.88±0.21                      | 0.87±0.31   | 1.03±0.34   |
|    | MAG (μV*s) | 14.61±7.38                     | 13.29±7.20  | 17.42±11.22 |
|    |            | <b>Tibialis anterior right</b> |             |             |

**Legend.** DP, UP, FP and BP represent, respectively, downward, upward, forward and backward perturbations. OL: onset latency; DA: duration of activation; MAG: activation magnitude; DC: dynamic camera; SC: static camera; EC: eyes closed. Color codes: blue represent shoulder abductors, orange posterior muscles and green anterior muscles.
