# Supplementary material for: Patterns of whole-body muscle activations following vertical perturbations during standing and walking
Source: PubMed Central journal article supplement (PMC8101216; doi:10.1186/s12984-021-00836-0), 2021-05-06
Supplement: 12984_2021_836_MOESM4_ESM.pdf [file 12984_2021_836_MOESM4_ESM.pdf]

**Table 2:** Values of EMG parameters during walking conditions

|    |            | Deltoid     |               | Paraspinals |               | Biceps femoris |               | Gastrocnemius |               |
|----|------------|-------------|---------------|-------------|---------------|----------------|---------------|---------------|---------------|
|    |            | ipsilateral | contralateral | ipsilateral | contralateral | ipsilateral    | contralateral | ipsilateral   | contralateral |
| DP | OL (s)     | 0.55±0.36   | 0.38±0.33     | 0.53±0.35   | 0.41±0.32     | 0.44±0.33      | 0.47±0.36     | 0.50±0.32     | 0.95±0.52     |
|    | DA (s)     | 0.79±0.29   | 0.95±0.31     | 0.80±0.33   | 0.95±0.34     | 0.79±0.28      | 0.79±0.28     | 0.84±0.35     | 0.53±0.29     |
|    | MAG (μV*s) | 39.85±25.85 | 49.56±29.84   | 42.68±36.99 | 48.71±31.57   | 46.30±26.29    | 40.20±20.81   | 51.14±39.12   | 38.93±30.95   |
| UP | OL (s)     | 0.48±0.30   | 0.52±0.39     | 0.41±0.22   | 0.47±0.34     | 0.38±0.25      | 0.45±0.31     | 0.55±0.28     | 0.60±0.31     |
|    | DA (s)     | 0.83±0.31   | 0.93±0.30     | 1.00±0.28   | 0.97±0.29     | 0.89±0.27      | 0.87±0.30     | 0.84±0.27     | 0.67±0.25     |
|    | MAG (μV*s) | 56.42±37.10 | 61.44±42.24   | 66.46±44.72 | 65.12±44.83   | 61.67±40.43    | 59.10±39.89   | 61.81±38.89   | 51.41±35.85   |
| FP | OL (s)     | 0.36±0.18   | 0.46±0.25     | 0.46±0.18   | 0.37±0.19     | 0.56±0.36      | 0.37±0.17     | 0.56±0.27     | 0.57±0.25     |
|    | DA (s)     | 0.99±0.27   | 0.94±0.24     | 0.99±0.23   | 1.02±0.25     | 0.83±0.28      | 0.86±0.25     | 0.84±0.27     | 0.91±0.29     |
|    | MAG (μV*s) | 66.95±27.62 | 69.66±37.90   | 74.42±44.02 | 78.27±45.67   | 69.64±38.46    | 68.05±35.92   | 72.15±41.39   | 74.78±43.46   |
| BP | OL (s)     | 0.43±0.31   | 0.41±0.33     | 0.49±0.43   | 0.44±0.39     | 0.41±0.31      | 0.34±0.16     | 0.40±0.31     | 0.88±0.60     |
|    | DA (s)     | 0.81±0.28   | 0.85±0.31     | 0.70±0.26   | 0.80±0.29     | 0.75±0.28      | 0.77±0.27     | 0.82±0.34     | 0.65±0.35     |
|    | MAG (μV*s) | 48.23±28.00 | 51.11±31.75   | 47.23±32.87 | 50.35±38.50   | 49.91±32.00    | 49.29±26.34   | 57.62±38.47   | 50.14±42.84   |

**Legend.** DP, UP, FP and BP represent, respectively, downward, upward, forward and backward perturbations. OL: onset latency; DA: duration of activation; MAG: activation magnitude. Color codes: blue represent shoulder abductors, orange posterior muscles and green anterior muscles. Opaque, clear colors respectively indicate contralateral, ipsilateral side.

**Table 2:** Values of EMG parameters during walking conditions

|    |            | External oblique |               | Rectus abdominis |               | Rectus femoris |               | Tibialis anterior |               |
|----|------------|------------------|---------------|------------------|---------------|----------------|---------------|-------------------|---------------|
|    |            | ipsilateral      | contralateral | ipsilateral      | contralateral | ipsilateral    | contralateral | ipsilateral       | contralateral |
| DP | OL (s)     | 0.52±0.34        | 0.40±0.37     | 0.58±0.36        | 0.52±0.37     | 0.50±0.39      | 0.44±0.26     | 0.62±0.39         | 0.49±0.30     |
|    | DA (s)     | 0.79±0.32        | 0.93±0.39     | 0.78±0.29        | 0.79±0.32     | 0.85±0.35      | 0.79±0.23     | 0.89±0.33         | 0.78±0.27     |
|    | MAG (μV*s) | 35.45±23.10      | 45.48±22.03   | 35.46±22.25      | 35.51±19.48   | 44.34±29.07    | 37.34±19.93   | 48.66±33.27       | 43.33±34.90   |
| UP | OL (s)     | 0.53±0.34        | 0.42±0.34     | 0.51±0.26        | 0.37±0.25     | 0.36±0.26      | 0.34±0.16     | 0.41±0.21         | 0.50±0.24     |
|    | DA (s)     | 0.77±0.28        | 0.90±0.34     | 0.86±0.22        | 0.85±0.34     | 0.90±0.29      | 0.87±0.22     | 0.99±0.32         | 0.90±0.33     |
|    | MAG (μV*s) | 50.13±30.36      | 57.45±41.01   | 58.25±42.34      | 56.79±38.03   | 57.46±30.80    | 63.90±49.83   | 67.88±48.10       | 62.40±41.13   |
| FP | OL (s)     | 0.53±0.32        | 0.33±0.19     | 0.48±0.19        | 0.42±0.20     | 0.39±0.21      | 0.45±0.23     | 0.33±0.19         | 0.44±0.19     |
|    | DA (s)     | 0.82±0.28        | 0.99±0.28     | 0.90±0.26        | 0.90±0.24     | 0.89±0.20      | 0.88±0.18     | 1.02±0.25         | 1.11±0.28     |
|    | MAG (μV*s) | 65.00±45.36      | 72.41±41.06   | 67.77±44.45      | 61.26±26.64   | 65.81±28.18    | 67.84±38.92   | 81.35±57.82       | 79.89±37.82   |
| BP | OL (s)     | 0.44±0.29        | 0.28±0.22     | 0.38±0.26        | 0.38±0.29     | 0.44±0.35      | 0.32±0.15     | 0.45±0.28         | 0.39±0.19     |
|    | DA (s)     | 0.76±0.27        | 0.89±0.24     | 0.81±0.23        | 0.84±0.29     | 0.78±0.29      | 0.83±0.20     | 0.94±0.28         | 0.80±0.26     |
|    | MAG (μV*s) | 48.92±26.28      | 51.50±30.07   | 51.22±26.74      | 55.53±37.89   | 42.20±22.21    | 48.81±23.42   | 56.57±35.40       | 51.74±32.88   |

**Legend.** DP, UP, FP and BP represent, respectively, downward, upward, forward and backward perturbations. OL: onset latency; DA: duration of activation; MAG: activation magnitude. Color codes: blue represent shoulder abductors, orange posterior muscles and green anterior muscles. Opaque, clear colors respectively indicate contralateral, ipsilateral side.
