# Supplementary material for: Patterns of whole-body muscle activations following vertical perturbations during standing and walking
Source: PubMed Central journal article supplement (PMC8101216; doi:10.1186/s12984-021-00836-0), 2021-05-06
Supplement: 12984_2021_836_MOESM5_ESM.pdf [file 12984_2021_836_MOESM5_ESM.pdf]

**Table 3:** Values of EMG parameters after visual perturbations

|    |            | Deltoid   |           | Paraspinals |           | Biceps femoris |           | Gastrocnemius |           |
|----|------------|-----------|-----------|-------------|-----------|----------------|-----------|---------------|-----------|
|    |            | Left      | Right     | Left        | Right     | Left           | Right     | Left          | Right     |
| DP | OL (s)     | 0.70±0.37 | 0.84±0.43 | 1.06±0.47   | 1.14±0.41 | 0.95±0.42      | 0.82±0.62 | 0.97±0.43     | 1.04±0.34 |
|    | DA (s)     | 0.83±0.47 | 0.81±0.27 | 0.65±0.38   | 0.58±0.39 | 0.69±0.31      | 0.86±0.47 | 0.82±0.33     | 0.73±0.34 |
|    | MAG (μV*s) | 4.37±3.73 | 3.76±1.76 | 3.62±4.19   | 3.60±4.87 | 3.67±2.55      | 3.91±3.46 | 4.88±3.87     | 5.67±5.77 |
| UP | OL (s)     | 0.91±0.41 | 1.02±0.60 | 1.06±0.45   | 1.13±0.55 | 0.75±0.56      | 0.81±0.57 | 1.02±0.50     | 0.67±0.32 |
|    | DA (s)     | 0.66±0.38 | 0.68±0.41 | 0.59±0.40   | 0.59±0.33 | 0.89±0.47      | 0.84±0.48 | 0.78±0.45     | 0.98±0.33 |
|    | MAG (μV*s) | 3.33±3.12 | 2.86±2.23 | 2.71±1.78   | 2.87±2.37 | 4.32±3.87      | 6.03±6.79 | 5.03±5.49     | 6.74±4.86 |
| FP | OL (s)     | 1.17±0.46 | 0.89±0.33 | 1.18±0.44   | 1.10±0.53 | 1.12±0.43      | 1.18±0.22 | 1.27±0.34     | 1.32±0.30 |
|    | DA (s)     | 0.56±0.30 | 0.69±0.28 | 0.60±0.31   | 0.54±0.35 | 0.70±0.34      | 0.61±0.22 | 0.62±0.30     | 0.53±0.24 |
|    | MAG (μV*s) | 3.71±3.44 | 2.70±1.53 | 3.11±2.55   | 2.97±2.50 | 3.71±3.76      | 3.76±3.18 | 3.80±2.48     | 4.93±6.80 |
| BP | OL (s)     | 1.09±0.44 | 0.82±0.50 | 1.11±0.44   | 0.79±0.56 | 0.96±0.35      | 0.89±0.30 | 0.88±0.34     | 0.83±0.28 |
|    | DA (s)     | 0.62±0.42 | 0.86±0.31 | 0.64±0.37   | 0.92±0.53 | 0.77±0.29      | 0.81±0.25 | 0.86±0.31     | 0.92±0.22 |
|    | MAG (μV*s) | 3.25±2.77 | 4.30±2.65 | 3.02±2.16   | 4.40±3.84 | 5.33±5.57      | 4.39±3.06 | 5.67±4.61     | 6.14±4.40 |

**Legend.** DP, UP, FP and BP represent, respectively, downward, upward, forward and backward perturbations.

OL: onset latency; DA: duration of activation; MAG: activation magnitude;

Color codes: blue represent shoulder abductors, orange posterior muscles and green anterior muscles.

**Table 3:** Values of EMG parameters after visual perturbations

|    |            | External oblique |           | Rectus abdominis |           | Rectus femoris |           | Tibialis anterior |           |
|----|------------|------------------|-----------|------------------|-----------|----------------|-----------|-------------------|-----------|
|    |            | Left             | Right     | Left             | Right     | Left           | Right     | Left              | Right     |
| DP | OL (s)     | 1.06±0.40        | 1.12±0.37 | 1.30±0.43        | 1.08±0.41 | 0.78±0.38      | 1.00±0.61 | 0.93±0.42         | 0.84±0.48 |
|    | DA (s)     | 0.66±0.33        | 0.66±0.36 | 0.44±0.32        | 0.55±0.25 | 0.88±0.26      | 0.82±0.52 | 0.83±0.42         | 0.98±0.44 |
|    | MAG (μV*s) | 3.10±1.77        | 3.23±1.92 | 2.50±1.93        | 2.88±1.92 | 4.19±2.13      | 3.56±2.19 | 4.47±0.31         | 7.22±6.75 |
| UP | OL (s)     | 1.12±0.40        | 1.09±0.33 | 1.11±0.42        | 1.11±0.56 | 0.83±0.30      | 1.09±0.42 | 1.15±0.55         | 1.18±0.38 |
|    | DA (s)     | 0.60±0.37        | 0.71±0.29 | 0.54±0.29        | 0.51±0.30 | 0.72±0.29      | 0.62±0.29 | 0.64±0.43         | 0.60±0.24 |
|    | MAG (μV*s) | 3.65±3.71        | 3.29±2.19 | 2.53±2.25        | 2.50±2.45 | 4.29±3.69      | 3.24±3.05 | 3.14±2.68         | 3.25±2.30 |
| FP | OL (s)     | 1.33±0.39        | 1.14±0.42 | 1.15±0.36        | 0.98±0.47 | 1.21±0.51      | 0.88±0.37 | 1.07±0.35         | 1.26±0.27 |
|    | DA (s)     | 0.45±0.37        | 0.63±0.36 | 0.50±0.33        | 0.72±0.36 | 0.61±0.44      | 0.83±0.42 | 0.71±0.39         | 0.60±0.23 |
|    | MAG (μV*s) | 1.95±1.94        | 3.52±4.36 | 2.00±1.28        | 2.63±1.43 | 2.58±2.15      | 4.07±2.71 | 4.06±3.92         | 3.63±3.47 |
| BP | OL (s)     | 0.99±0.35        | 0.97±0.48 | 1.03±0.36        | 0.84±0.43 | 0.92±0.47      | 1.01±0.46 | 0.73±0.36         | 0.91±0.38 |
|    | DA (s)     | 0.73±0.34        | 0.86±0.48 | 0.62±0.39        | 0.84±0.50 | 0.77±0.45      | 0.67±0.40 | 0.95±0.38         | 0.87±0.32 |
|    | MAG (μV*s) | 3.69±4.35        | 4.36±3.00 | 3.48±3.54        | 4.61±3.88 | 3.44±2.60      | 2.98±2.73 | 5.26±5.39         | 4.61±3.03 |

**Legend.** DP, UP, FP and BP represent, respectively, downward, upward, forward and backward perturbations.

OL: onset latency; DA: duration of activation; MAG: activation magnitude;

Color codes: blue represent shoulder abductors, orange posterior muscles and green anterior muscles.
